# Supplementary material
Source: Springer Nature journal article supplement (https://www.springermedizin.de/resource/supplementary/12986_2010_269_MOESM5_ESM.pdf/25655722)

A

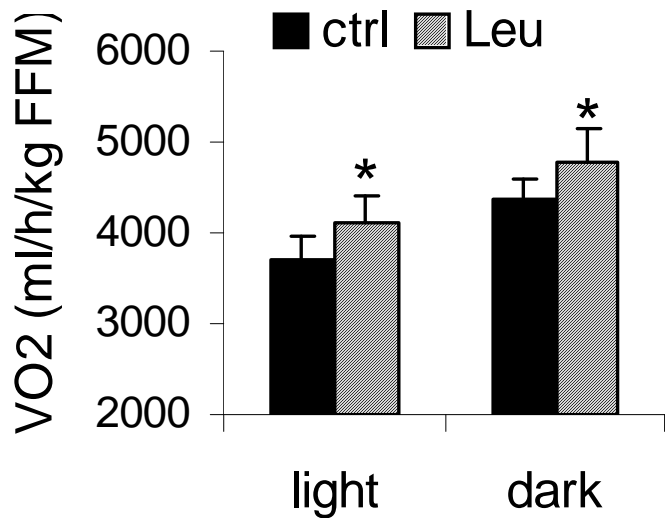

B

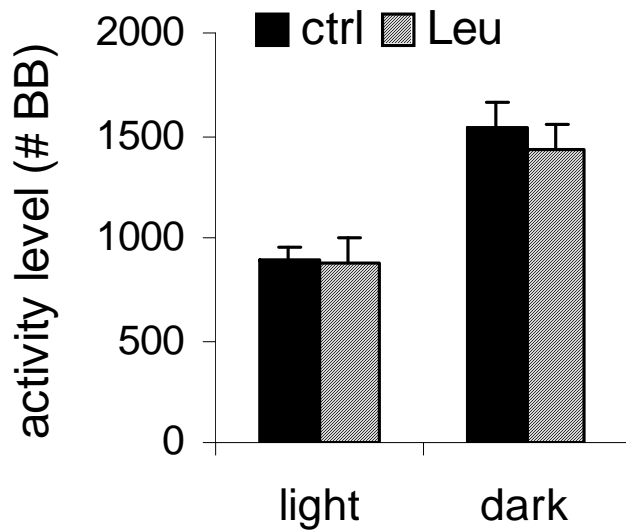

C

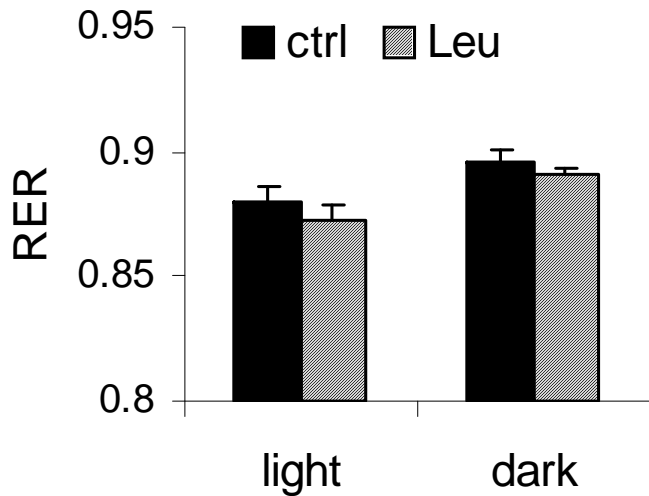

D

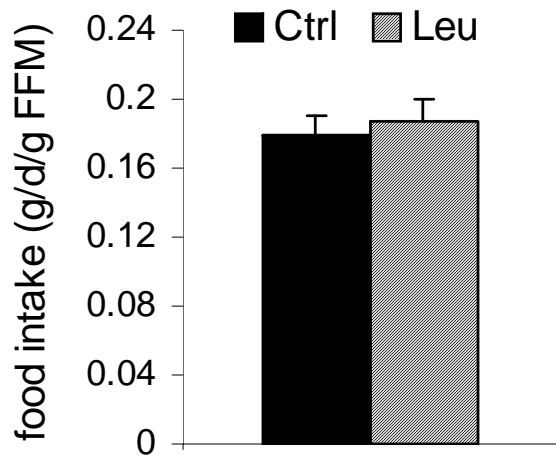

Supplement: MOESM5 [file 25655722]
